# Supplementary material for: Small-Molecule Inhibition of the Acyl-Lysine Reader ENL as a Strategy against Acute Myeloid Leukemia
Source: PubMed Central journal article supplement — Cancer Discov. 2022 Sep 2;12(11):2684–709. doi: 10.1158/2159-8290.CD-21-1307 (PMC9627135; doi:10.1158/2159-8290.cd-21-1307), 2022-09-02
Supplement: cd-21-1307_supp1.pdf [file cd-21-1307_supp1.pdf]

## Supplementary Material for

### Small-molecule inhibition of the acyl-lysine reader ENL as a strategy against acute myeloid leukemia

Yiman Liu<sup>1,2</sup>, Qinglan Li<sup>1,2</sup>, Fatemeh Alikarami<sup>3</sup>, Declan R. Barrett<sup>3</sup>, Leila Mahdavi<sup>3</sup>, Hangpeng Li<sup>1,2,4</sup>, Sylvia Tang<sup>1,2</sup>, Tanweer A. Khan<sup>5</sup>, Mayako Michino<sup>5</sup>, Connor Hill<sup>6,7</sup>, Lele Song<sup>1,2</sup>, Lu Yang<sup>8</sup>, Yuanyuan Li<sup>9</sup>, Sheela Pangeni Pokharel<sup>8</sup>, Andrew W. Stamford<sup>5</sup>, Nigel Liverton<sup>5</sup>, Louis M. Renzetti<sup>10</sup>, Simon Taylor<sup>11</sup>, Gillian F. Watt<sup>11</sup>, Tammy Ladduwahetty<sup>11</sup>, Stacia Kargman<sup>5,10</sup>, Peter T. Meinke<sup>5,12</sup>, Michael A. Foley<sup>5</sup>, Junwei Shi<sup>1,2,13</sup>, Haitao Li<sup>9</sup>, Martin Carroll<sup>14</sup>, Chun-Wei Chen<sup>8</sup>, Alessandro Gardini<sup>6</sup>, Ivan Maillard<sup>14</sup>, David J. Huggins<sup>5,15</sup>, Kathrin M. Bernt<sup>3,16,#</sup>, Liling Wan<sup>1,2,13,17,#</sup>

<sup>1</sup>Department of Cancer Biology, University of Pennsylvania, Philadelphia, PA, 19104, USA.

<sup>2</sup>Abramson Family Cancer Research Institute, Perelman School of Medicine, University of Pennsylvania, Philadelphia, PA, 19104, USA.

<sup>3</sup>Division of Pediatric Oncology, Children's Hospital of Philadelphia, Philadelphia, PA, USA.

<sup>4</sup>Department of the School of Engineering and Applied Science, University of Pennsylvania, Philadelphia, PA, 19104, USA.

<sup>5</sup>Tri-Institutional Therapeutics Discovery Institute, 413 East 69th Street, New York, NY, 10021, USA.

<sup>6</sup>Wistar Institute, Gene Expression and Regulation Program, 3601 Spruce Street, Philadelphia, PA 19104, USA.

<sup>7</sup>Cell and Molecular Biology Graduate Group, Perelman School of Medicine, University of Pennsylvania, PA 19104, USA.

<sup>8</sup>Department of Systems Biology, Beckman Research Institute, City of Hope, Duarte, CA, 91016 USA.

<sup>9</sup>MOE Key Laboratory of Protein Sciences, Beijing Frontier Research Center for Biological Structure, School of Medicine, Tsinghua University, and Tsinghua-Peking Center for Life Sciences, Beijing 100084, China.

<sup>10</sup>Bridge Medicines, 420 East 70<sup>th</sup> Street, NY, NY, 10021, USA.

<sup>11</sup>Pharmaron Drug Discovery, Pharmaron UK, West Hill Innovation Park, Hertford Road, Hoddesdon, Hertfordshire, EN11 9FH. United Kingdom.

<sup>12</sup>Department of Pharmacology, Weill Cornell Medical College, New York, NY 10021, USA.

<sup>13</sup>Epigenetics Institute, Perelman School of Medicine, University of Pennsylvania, Philadelphia, PA, 19104, USA.

<sup>14</sup>Division of Hematology/Oncology, Department of Medicine, Perelman School of Medicine, University of Pennsylvania, Philadelphia, PA 19104, USA.

<sup>15</sup>Department of Physiology and Biophysics, Weill Cornell Medical College, New York, NY, 10021, USA.

<sup>16</sup>Department of Pediatrics, Perelman School of Medicine, University of Pennsylvania, Philadelphia, PA, 19104, USA.

<sup>17</sup>Institute for Regenerative Medicine, Perelman School of Medicine, University of Pennsylvania, Philadelphia, PA, 19104, USA.

#Corresponding Authors:

Liling Wan, University of Pennsylvania, BRB II/III, RM751, 421 Curie Blvd, Philadelphia, PA 19104. Phone: 215-898-3116; E-mail: [Liling.Wan@Pennmedicine.upenn.edu](mailto:Liling.Wan@Pennmedicine.upenn.edu);

Kathrin M. Bernt, The Children's Hospital of Philadelphia, Colket Translational Research Center room 3064, 3501 Civic Center Boulevard, Philadelphia, PA 19104. Phone: 215-370-3171; E-mail: [berntk@chop.edu](mailto:berntk@chop.edu)

## Supplementary Methods

Compound synthesis

## Supplementary Figures with Legends

Supplementary Figure S1. Development of a potent, selective, and orally bioavailable ENL/AF9 YEATS inhibitor.

Supplementary Figure S2. Inhibition of ENL suppresses cellular growth of *MLL-r* and *NPM1*-mutated leukemia cells

Supplementary Figure S3. CRISPR-Cas9-mediated mutagenesis screen identifies a mutant, drug-resistant *ENL* allele.

Supplementary Figure S4. Gene expression changes induced by TDI-11055 in OCI-AML3 cells.

Supplementary Figure S5. Chromatin changes induced by TDI-11055.

Supplementary Figure S6. Rapid transcriptional changes induced by TDI-11055 treatment at early time points are not attributed to loss of DOT1L-mediated H3K79 methylation.

Supplementary Figure S7. TDI-11055 induces differentiation of *MLL-r* and *NPM1*-mutated primary AML samples.

Supplementary Figure S8. *In vivo* effect of TDI-11055 in xenograft models of *MLL-r* and *NPM1*-mutated leukemia.

Supplementary Figure S9. The impact of TDI-11055 on normal hematopoiesis after 28 days of treatment.

Supplementary Figure S10. TDI-11055-induced changes in normal hematopoiesis are reversible after cessation of treatment.

## Supplementary Tables

Supplementary Table S1. Flag-ENL peaks in MOLM-13 cells treated with DMSO or TDI-11055 for 24 hours.

Supplementary Table S2. Raw counts and log<sub>2</sub> fold-change of normalized read counts for all sgRNAs used in the CRISPR-Cas9-mediated saturated mutagenesis screen in MV4;11 cells.

Supplementary Table S3. Raw counts and log<sub>2</sub> fold-change of normalized read counts for ENL sgRNAs used in the CRISPR-Cas9-mediated saturated mutagenesis screen in MV4;11 cells.

Supplementary Table S4. Oligos used in this study.

Supplementary Table S5. ENL mutations induced by *ENL* sgRNA#326 and sgRNA#323 in MV4;11 cells treated with TDI-11055.

Supplementary Table S6. Genes differentially expressed in TDI-11055 vs. DMSO treatment conditions in MV4;11 cells.

Supplementary Table S7. GSEA gene sets used in this study.

Supplementary Table S8. Genes differentially expressed in TDI-11055 vs. DMSO treatment conditions in OCI-AML3 cells.

Supplementary Table S9. HA-ENL peaks in MV4;11 cells treated with DMSO or TDI-11055 for 0.5 hour.

Supplementary Table S10. HA-ENL ChIP-seq normalized read counts at TSS +/- 3 kb regions of HA-ENL-bound genes in MV4;11 cells.

Supplementary Table S11. AFF1 ChIP-seq normalized read counts at TSS +/- 3 kb regions of different subsets of genes in MV4;11 cells treated with DMSO or TDI-11055 for 24 hours.

Supplementary Table S12. DOT1L ChIP-seq normalized read counts at TSS +/- 3 kb regions of different subsets of genes in MV4;11 cells treated with DMSO or TDI-11055 for 24 hours.

Supplementary Table S13. PAF1 ChIP-seq normalized read counts at TSS + 300 bp to TES regions of different subsets of genes in MV4;11 cells treated with DMSO or TDI-11055 for 24 hours.

Supplementary Table S14. AFF1 ChIP-seq normalized read counts at TSS +/- 3 kb regions of different subsets of genes in MV4;11 cells treated with DMSO or TDI-11055 for 0.5 hour.

Supplementary Table S15. DOT1L ChIP-seq normalized read counts at TSS +/- 3 kb regions of different subsets of genes in MV4;11 cells treated with DMSO or TDI-11055 for 0.5 hour.

Supplementary Table S16. Pol II S2P ChIP-seq normalized read counts at TSS + 300 bp to TES regions of different subsets of genes in MV4;11 cells treated with DMSO or TDI-11055 for 2 hours.

Supplementary Table S17. Pol II S2P ChIP-seq normalized read counts at TSS + 300 bp to TES regions of different subsets of genes in MV4;11 cells treated with DMSO or TDI-11055 for 24 hours.

Supplementary Table S18. Pol II ChIP-seq normalized read count density at promoter proximal regions (TSS +/- 300 bp) and gene body (TSS + 300 bp to TES) regions of different subsets of genes in MV4;11 cells treated with DMSO or TDI-055 for 24 hours.

Supplementary Table S19. H3K79me2 ChIP-seq normalized read counts at TSS +/- 3 kb regions of different subsets of genes in MV4;11 cells treated with DMSO or TDI-11055 for 24 hours.

Supplementary Table S20. Characterization of human primary patient samples used in this study.

Supplementary Table S21. Antibodies used in this study.

A

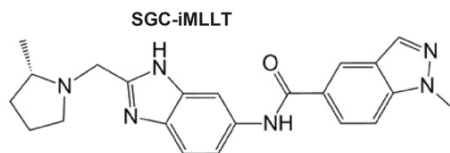

B

| SGC-iMLLT Mouse PK             | P.O., 30 mg/kg | P.O., 100 mg/kg |
|--------------------------------|----------------|-----------------|
| C <sub>max</sub> (nM, unbound) | 727            | 13100           |
| t <sub>max</sub> (h)           | 0.25           | 0.25            |
| AUC <sub>inf</sub> (h.ng/mL)   | 1350           | 23131           |
| t <sub>1/2</sub> (h)           | 0.84           | 0.83            |
| F <sub>po</sub> (%)            | 41             | 210             |

C

| Compound                              | TDI-11055 | SGC-iMLLT |
|---------------------------------------|-----------|-----------|
| ENL, TR-FRET IC <sub>50</sub> (μM)    | 0.050*    | 0.121     |
| AF9, TR-FRET IC <sub>50</sub> (μM)    | 0.066     | 0.218     |
| GAS41, TR-FRET IC <sub>50</sub> (μM)  | >100      | >100      |
| YEATS2, TR-FRET IC <sub>50</sub> (μM) | >100      | N.A.      |

F

| Parameter                                                                | TDI-11055        |
|--------------------------------------------------------------------------|------------------|
| MW (g/mol)                                                               | 388.5            |
| LogD <sub>7.4</sub>                                                      | 2.34             |
| cpKa (strongest)                                                         | 8.62 (basic)     |
| Permeability (P <sub>app</sub> ) Caco-2 AB/BA/ER (10 <sup>-6</sup> cm/s) | 6.1 / 14.3 / 2.4 |
| Solubility PBS, pH7.4 (uM)                                               | 269              |
| Solubility, FaSSIF (uM)                                                  | 2500             |
| Unbound fraction in plasma                                               | 0.31             |

G

| TDI-11055 Mouse PK                     | P.O., 30 mg/kg | P.O., 50 mg/kg | P.O., 100 mg/kg |
|----------------------------------------|----------------|----------------|-----------------|
| t <sub>max</sub> (h)                   | 0.5            | 0.5            | 0.5             |
| C <sub>max</sub> (nM, unbound)         | 1181           | 1967           | 5596            |
| AUC <sub>inf</sub> (h.ng/mL)           | 5512           | 9707           | 29151           |
| AUC <sub>inf</sub> , unbound (h.ng/mL) | 1709           | 3009           | 9037            |
| t <sub>1/2</sub> (h)                   | 2.7            | 2.8            | 5.0             |
| F <sub>po</sub> (%)                    | 109            | 116            | 173             |

D

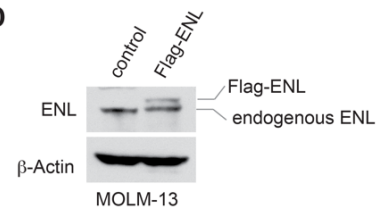

E

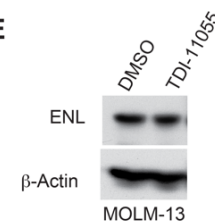

**Supplementary Figure S1. Development of a potent, selective, and orally bioavailable ENL/AF9 YEATS inhibitor.** **A**, Chemical structures of SGC-iMLLT. **B**, PK parameters for SGC-iMLLT upon oral administration at 30mg/kg and 100mg/kg doses to mice. Pharmacokinetic parameters: C<sub>max</sub> (maximum concentration achieved), *t*<sub>max</sub> (time at which the max concentration remained), AUC<sub>inf</sub> (area under the curve infinity), *t*<sup>1/2</sup> (time at which half of the max concentration remained), F<sub>po</sub> (oral bioavailability). P.O., (Per os), *n* = 3 mice / group. **C**, Table summarizing IC<sub>50</sub> concentrations for TDI-11055 and SGC-iMLLT obtained in TR-FRET (Time-resolved Fluorescence Resonance Energy Transfer) assays. Note (\*), as the ENL TR-FRET assays uses a protein concentration of 125 nM, its limit for potency measurements is approximately 62.5 nM. Therefore, the IC<sub>50</sub> of TDI-11055 may be lower than its reported value of 50 nM. **D**, Immunoblots showing levels of ectopically expressed Flag-ENL and endogenous ENL in MOLM-13 cells. β-Actin was used as loading control. **E**, Immunoblots showing levels of endogenous ENL proteins in MOLM-13 cells treated with DMSO or 5 μM TDI-11055 for 24 hours. β-Actin is used as loading control. **F**, Permeability parameters of TDI-11055 were measured in Caco2 cell monolayers. LogD<sub>7.4</sub> (partition coefficient between 1-octanol and aqueous buffer pH 7.4), cpKa (catalytic unit of protein kinase A), FaSSIF (Fasted State Simulated Intestinal Fluid). **G**, PK parameters for TDI-11055 upon oral administration at 30 mg/kg, 50 mg/kg, and 100 mg/kg to mice. Pharmacokinetic parameters: *t*<sub>max</sub> (time at which the max concentration was remained), C<sub>max</sub> (maximum concentration achieved), AUC<sub>inf</sub> (area under the curve infinity), *t*<sup>1/2</sup> (time at which half of the max concentration remained), F<sub>po</sub> (oral bioavailability). P.O. (Per os), *n* = 3 mice / group.

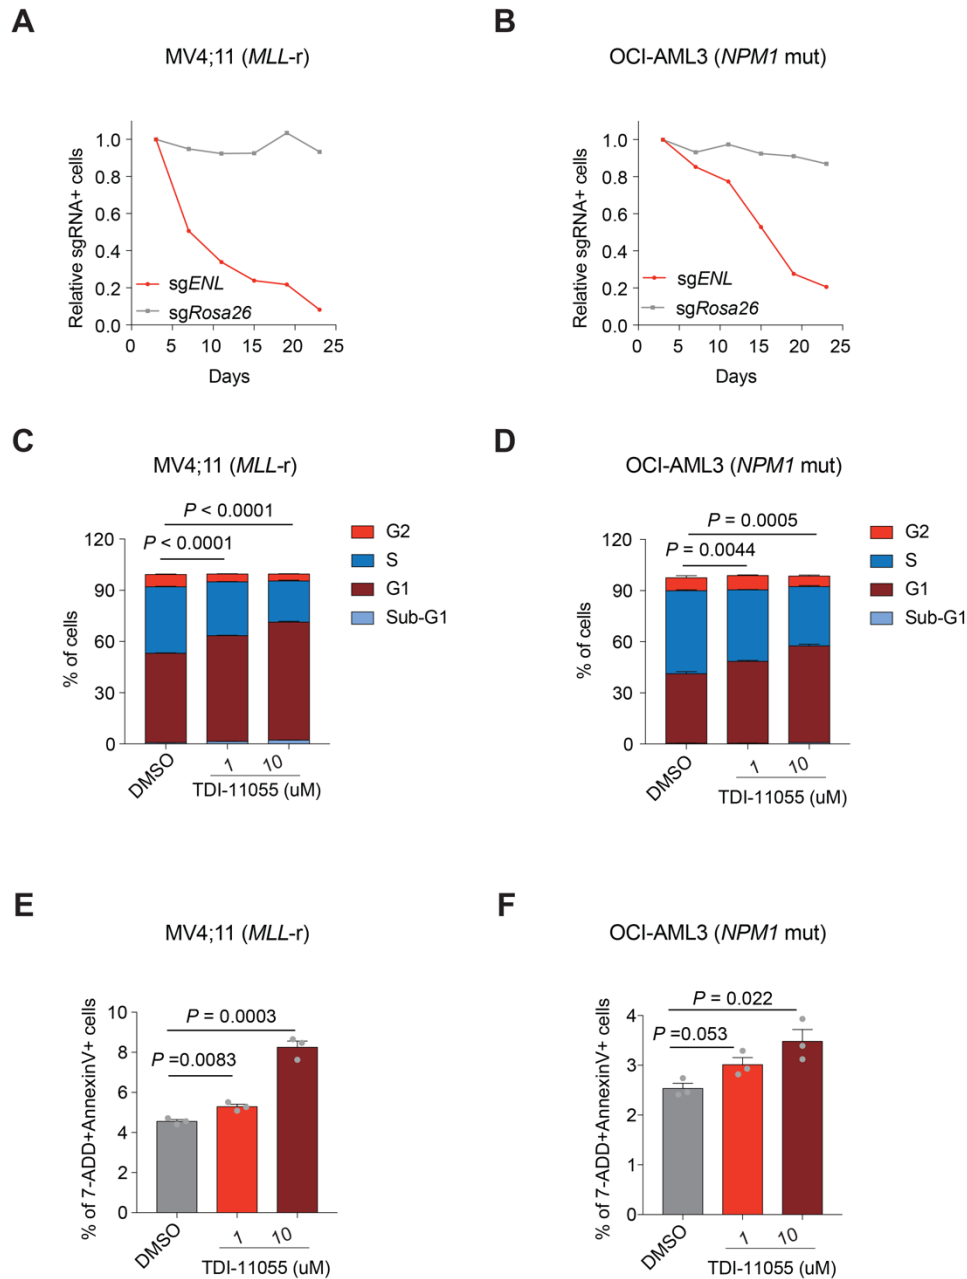

**Supplementary Figure S2. Inhibition of ENL suppresses cellular growth of *MLL-r* and *NPM1*-mutated leukemia cells.** **A, B**, A proliferation competition assay of MV4;11 (**A**), and OCI-AML3 (**B**) cells transduced with indicated sgRNAs. A sgRNA targeting Rosa26 (grey) serves as a negative control. **C, D**, Cell cycle analysis of MV4;11 (**C**) and OCI-AML3 (**D**) cells treated with DMSO or TDI-11055 (1 and 10  $\mu$ M) for 72 hours. Error bars represent mean  $\pm$  SEM ( $n = 3$ ).  $P$  value in G1 phase using unpaired two-tailed Student's  $t$ -test. **E, F**, Flow cytometric analysis showing the apoptosis percentage of MV4;11 (**E**) and OCI-AML3 (**F**) cells treat with DMSO or TDI-11055 (1 and 10  $\mu$ M) for 72 hours. Error bars represent mean  $\pm$  SEM ( $n = 3$ ).  $P$  value using unpaired two-tailed Student's  $t$ -test.

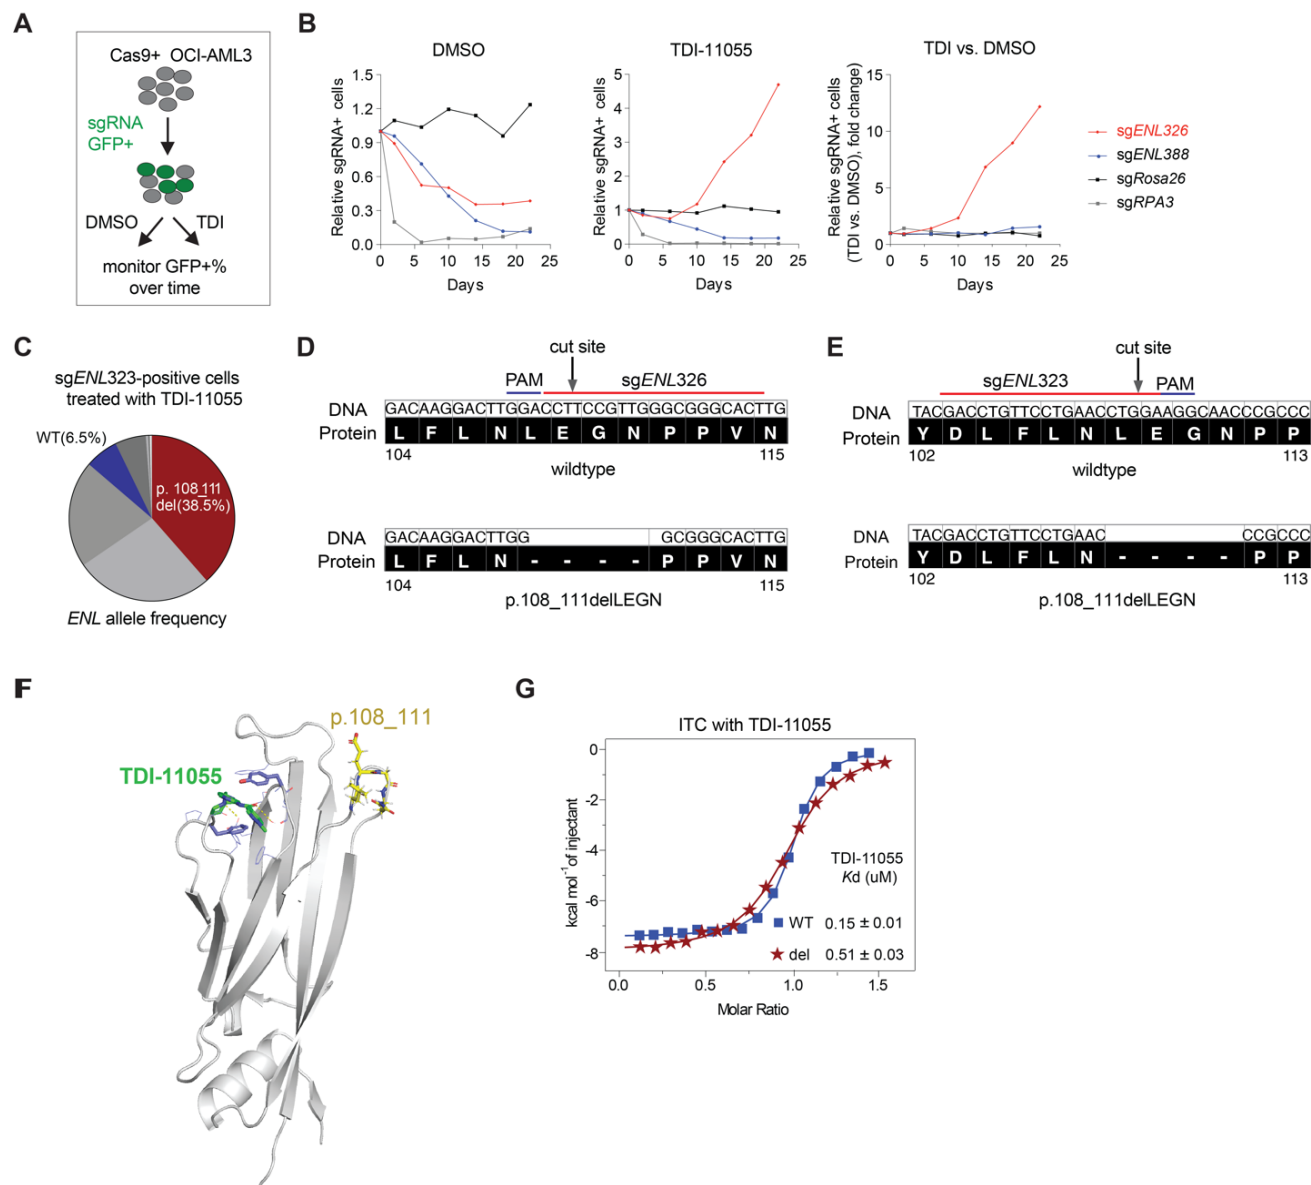

**Supplementary Figure S3. CRISPR-Cas9-mediated mutagenesis screen identifies a mutant, drug-resistant *ENL* allele.** **A**, Schematic for a proliferation competition assay used in **(B)**. **B**, Left and center: plots showing the relative fitness of indicated sgRNA<sup>+</sup> OCI-AML3 cells under DMSO (left) or TDI-11055 (5 $\mu$ M, center) treatment conditions; right, plots showing the fold-change enrichment (TDI-11055 vs. DMSO) of indicated sgRNA<sup>+</sup> cells. A sgRNA targeting *Rosa26* (black) or *RPA3* (grey) serves as a negative or positive control, respectively. *sgENL326* (red), but not *sgENL388* (blue), can induce mutation(s) in *ENL* that confers a growth advantage under TDI-11055 treatment condition. **C**, Pie chart of the relative abundance of *ENL* mutations induced by *sgENL323* in MV4;11 cells with long-term treatment of TDI-11055. Each slice represents the enrichment of a single mutant *ENL* allele. See Supplementary Table S5. **D**, **E**, DNA and protein sequence diagrams of the wildtype *ENL* and the drug-resistant, mutated *ENL* induced by *sgENL326* (**D**) or *sgENL323* (**E**) CRISPR mutagenesis under TDI-11055 treatment. **F**,



Docking structural view of ENL YEATS (grey ribbon): TDI-11055 (green stick) showing the amino acids LEGN (yellow stick) which is deleted in the drug-resistant ENL mutant. **G**, ITC experiment demonstrating TDI-11055 binds weaker to ENL (delLEGN) YEATS domain than to the ENL (WT).

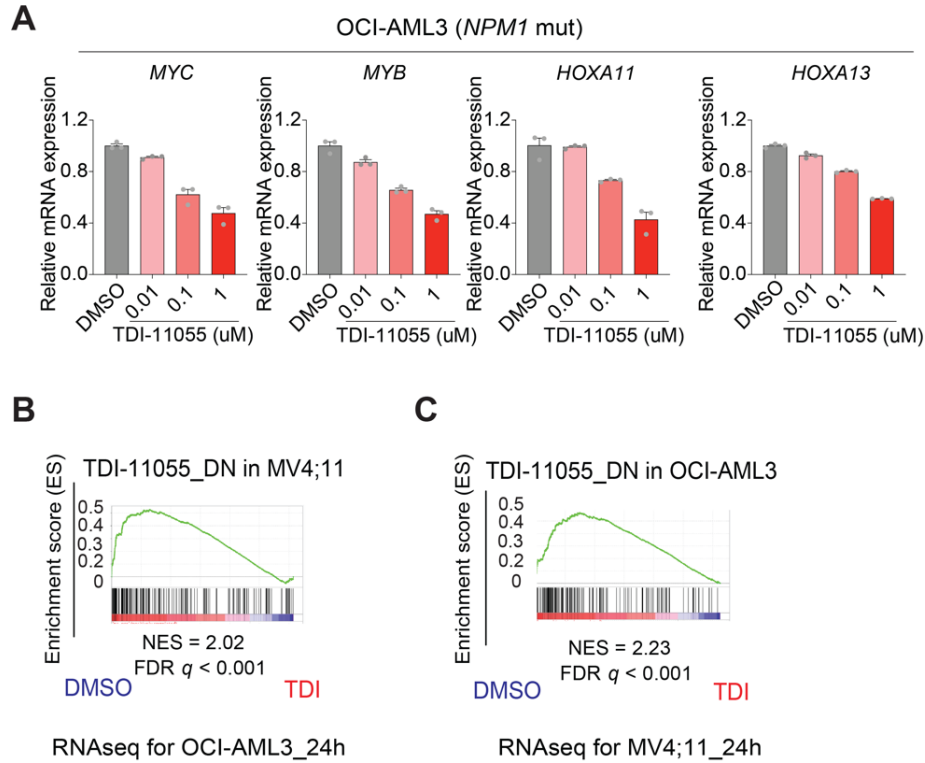

**Supplementary Figure S4. Gene expression changes induced by TDI-11055 in OCI-AML3 cells.** **A**, RT-qPCR analysis showing mRNA expression levels (normalized to *B2M*) of selected genes in OCI-AML3 cells upon treatment with increasing dosages of TDI-11055 for 72 hours. Error bars represent mean  $\pm$  SEM ( $n = 3$ ). **B**, GSEA plot evaluating gene expression changes in OCI-AML3 cells treated with TDI-11055 (1  $\mu$ M for 24 hours) with genes downregulated in MV4;11 cells upon TDI-11055 treatment (5  $\mu$ M for 24 hours). FDR, false discovery rate; NES, normalized enrichment score. **C**, GSEA plot evaluating gene expression changes in MV4;11 cells treated with TDI-11055 (5  $\mu$ M for 24 hours) with genes downregulated in OCI-AML3 cells upon TDI-11055 treatment (1  $\mu$ M for 24 hours). FDR, false discovery rate; NES, normalized enrichment score.

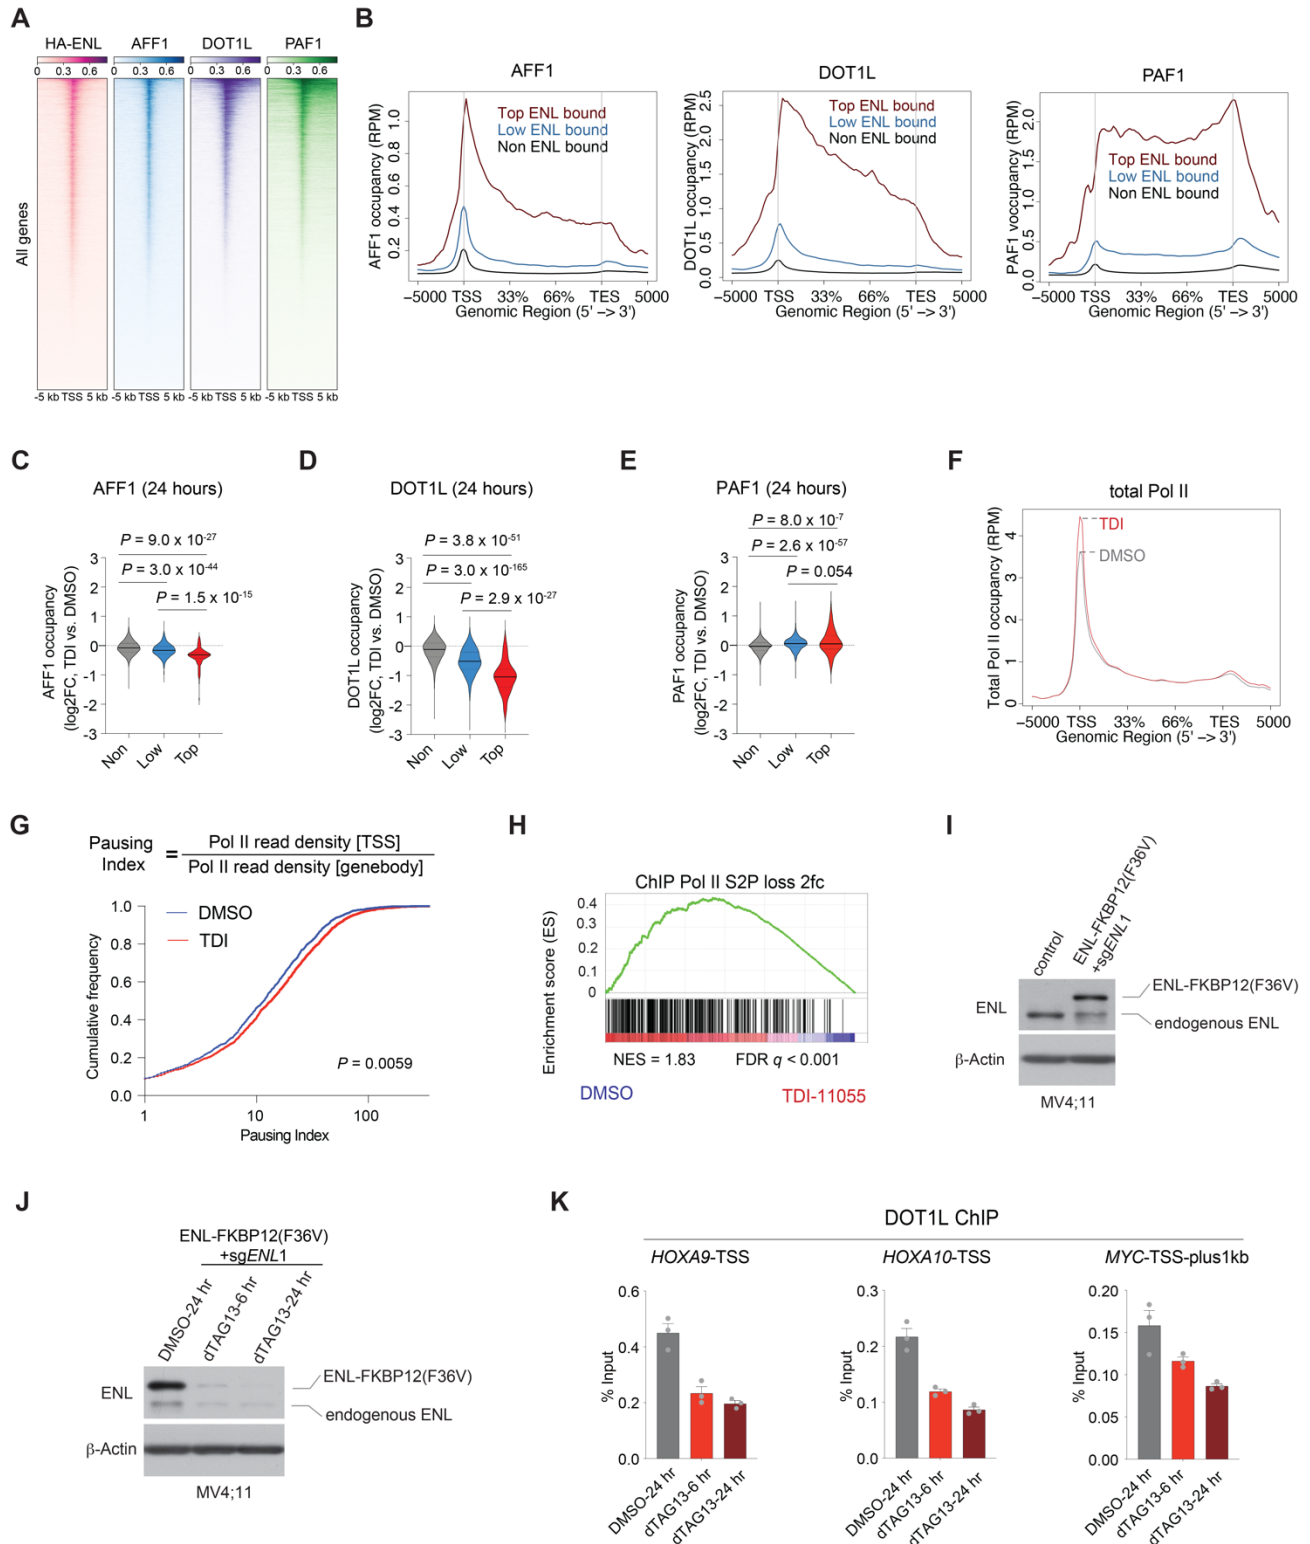

**Supplementary Figure S5. Chromatin changes induced by TDI-11055.** **A**, HA-ENL, AFF1, DOT1L, and PAF1 ChIP-seq data in MV4;11 cells were plotted as heatmap plots across genes in the genome at transcription start site (TSS)  $\pm$  5 kb. **B**, Average occupancies of AFF1, DOT1L,

and PAF1 at top, low, and non-ENL-bound genes along the transcription unit. TSS, transcription start site; TES, transcription end site. See Supplementary Tables S11-S13. **C-E**, Quantification of AFF1 (**C**), DOT1L (**D**), and PAF1 (**E**) on top, low, and non-ENL-bound genes along the transcription unit in DMSO and TDI-11055 (5  $\mu$ M for 24 hours) treatment conditions. Black solid lines denote median and black dash lines denote quartiles. *P* values by Welch's two-tailed *t*-test. See Supplementary Tables S11-S13. **F**, Average occupancies of total Pol II at ENL-bound genes along the transcription unit in DMSO (grey) and TDI-11055 (red, 5  $\mu$ M for 24 hours) treatment conditions. See Supplementary Table S18. **G**, Top, illustration of the pausing index calculation based on the ratio of Pol II density around the TSS (TSS +/- 300 bp) to Pol II density in the gene body (TSS + 300bp to TES). Bottom, empirical cumulative density function (ECDF) plots of Pol II pausing index in DMSO (grey) and TDI-11055 (red, 5  $\mu$ M for 24 hours) treatment conditions at ENL-bound genes in MV4;11 cells. *P* value was calculated using Kolmogorov-Smirnov test. **H**, GSEA plot evaluating transcriptional changes in MV4;11 cells upon TDI-11055 treatment (5  $\mu$ M for 24 hours) for genes whose Pol II S2P occupancy is decreased by TDI-11055. FDR, false discovery rate; NES, normalized enrichment score. **I**, Immunoblots showing protein levels of ectopically expressed ENL-FKBP12(F36V) and endogenous ENL in Cas9-positive MV4;11 cells expressing a sgRNA targeting only the endogenous *ENL* gene.  $\beta$ -Actin was used as loading control. **J**, Immunoblots showing a decrease in ENL-FKBP12(F36V) proteins upon dTAG13 (500 nM, 6 and 24 hours).  $\beta$ -Actin was used as loading control. **K**, ChIP-qPCR analysis of DOT1L at select ENL target genes (*HOXA9/10*, *MYC*) in MV4;11 cells expressing sg*ENL1* and ENL-FKBP12(F36V) and treated with DMSO or 500 nM dTAG-13 (6 and 24 hours). TSS, transcription start site; Error bars represent mean  $\pm$  SEM (*n* = 3).

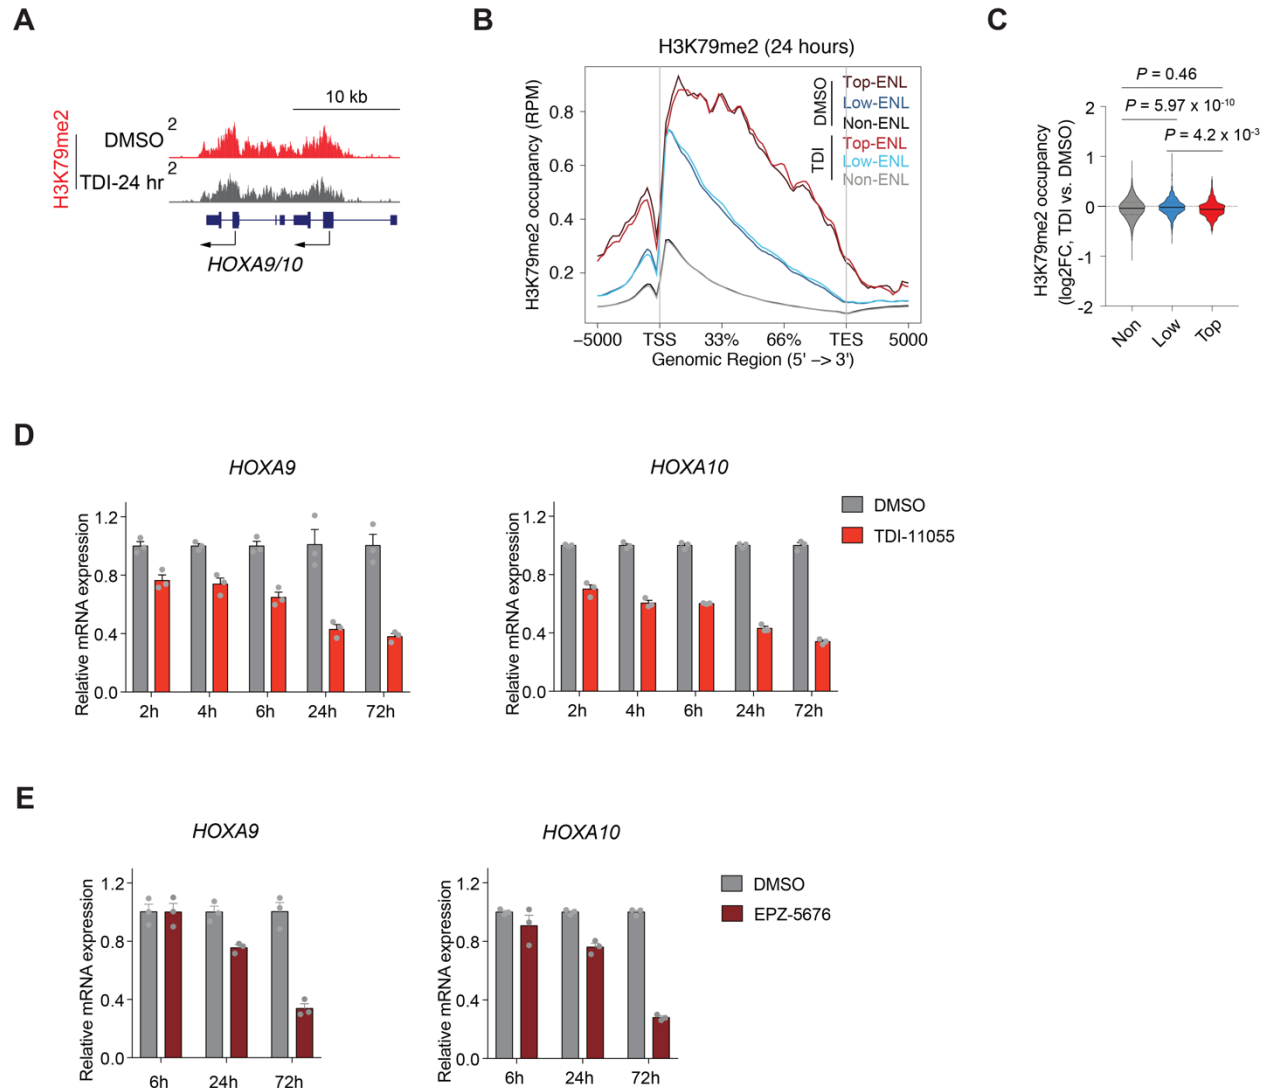

**Supplementary Figure S6. Rapid transcriptional changes induced by TDI-11055 treatment at early time points are not attributed to loss of DOT1L-mediated H3K79 methylation.** **A**, The genome browser view of H3K79me2 ChIP-seq signal at *HOXA9/10* genes under DMSO and TDI-11055 (5  $\mu$ M for 24 hours) treatment conditions in MV4;11 cells. **B**, **C**, Average occupancies (**B**) and quantification of H3K79me2 (**C**) on top, low, and non-ENL-bound genes along the transcription unit in DMSO and TDI-11055 (5  $\mu$ M for 24 hours) treatment conditions. TSS, transcription start site; TES, transcription end site. In (**C**), black solid lines denote median, and black dash lines denote quartiles. See Supplementary Table S19. **D**, RT-qPCR analysis showing mRNA expression levels (normalized to *B2M*) of *HOXA9* (left) and *HOXA10* (right) in MV4;11 cells upon treatment with TDI-11055 (1  $\mu$ M) for the indicated time. Error bars represent mean  $\pm$  SEM ( $n = 3$ ). **E**, RT-qPCR analysis showing mRNA expression levels (normalized to *B2M*) of *HOXA9* (left) and *HOXA10* (right) in MV4;11 cells upon treatment with the DOT1L inhibitor EPZ-5676 (1  $\mu$ M) for the indicated time. Error bars represent mean  $\pm$  SEM ( $n = 3$ ).

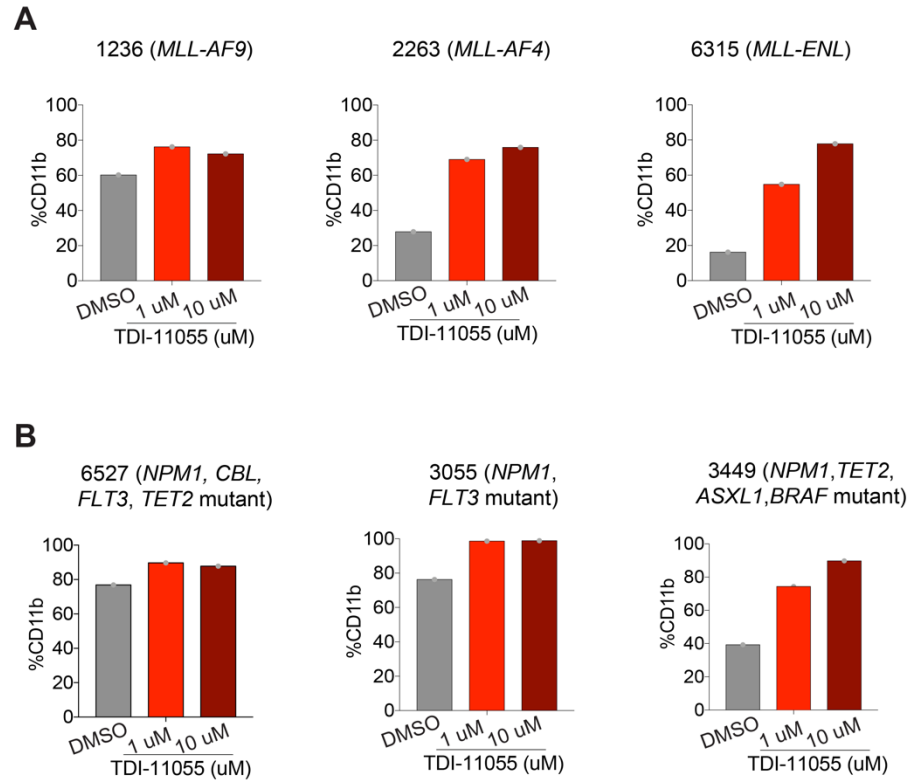

**Supplementary Figure S7. TDI-11055 induces differentiation of *MLL-r* and *NPM1*-mutated primary AML samples. A, B,** Flow cytometric analysis of CD11b expression levels in three different *MLL-r* (**A**) and three different *NPM1*-mutated (**B**) primary AML samples under DMSO or TDI-11055 (1 and 10  $\mu$ M) treatment conditions. See Supplementary Table S20 for more information about the primary patient samples.

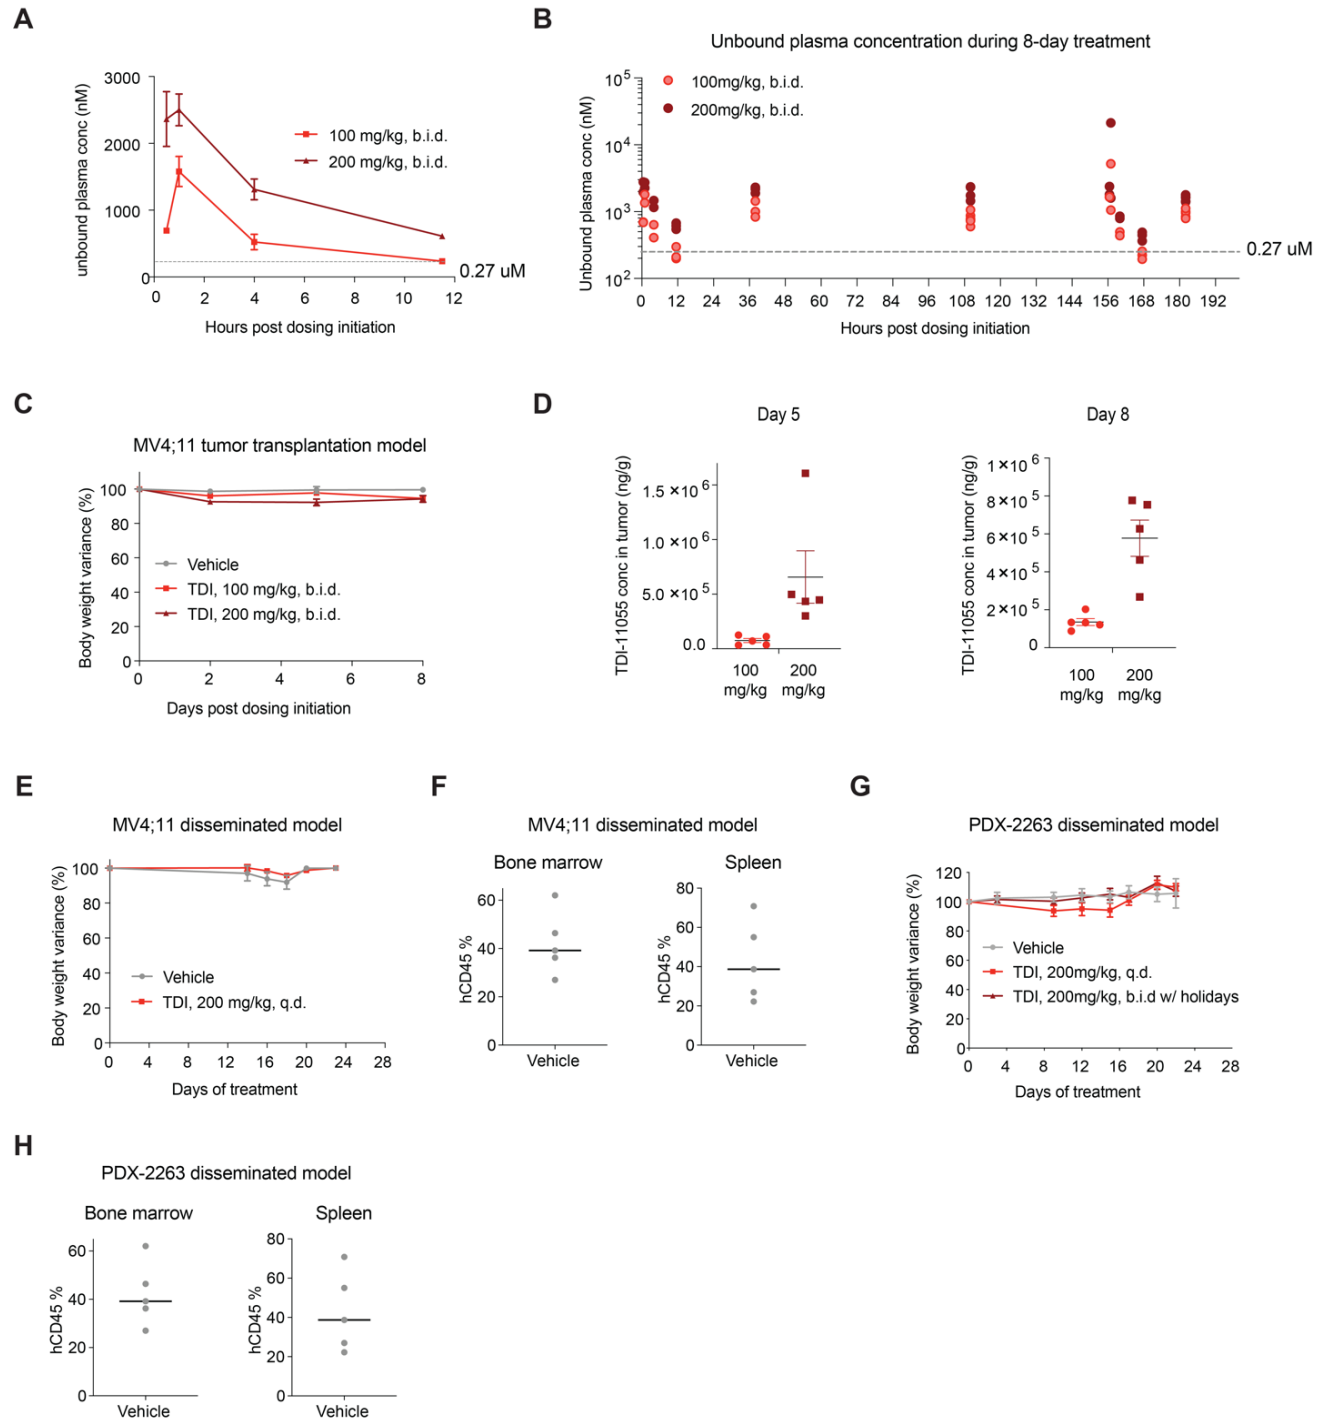

**Supplementary Figure S8. *In vivo* effect of TDI-11055 in xenograft models of *MLL-r* and *NPM1*-mutated leukemia.** **A**, Pharmacokinetic profile in tumor bearing mice demonstrating unbound plasma concentrations of TDI-11055 after oral administration at 100 and 200 mg/kg within the first 12 hours were maintained above the *in vitro* IC50 (0.27  $\mu$ M, dash line) for MV4;11 cell proliferation. Error bars represent mean  $\pm$  SEM (for 0.5, 1, 4 hours,  $n = 2$ ; for 11.5

hours,  $n = 3$ ). b.i.d, twice daily. **B**, Pharmacokinetic profile in tumor bearing mice demonstrating unbound plasma concentrations of TDI-11055 after oral administration at 100 and 200 mg/kg over 8 days were maintained above the *in vitro* IC50 for MV4;11. **C**, Body weight variance overtime in BALB/c nude mice subcutaneously transplanted with MV4;11 cells and treated with the indicated doses of TDI-11055 (100 or 200 mg/kg, p.o., b.i.d). Error bars represent mean  $\pm$  SEM ( $n = 5$ ). **D**, Pharmacokinetic profile in mice demonstrating concentration of TDI-11055 in tumors after oral administration of TDI-11055 (b.i.d) at 100 and 200 mg/kg for 5 days (left) or 8 days (right). Error bars represent mean  $\pm$  SEM ( $n = 5$ ). **E**, Body weight variance overtime in NSG mice transplanted with MV4;11 cells and treated with vehicle or TDI-11055 (200mg/kg, p.o., q.d.). Error bars represent mean  $\pm$  SEM ( $n = 5$ ). **F**, % of human CD45<sup>+</sup> cells in the bone marrow (left) and the spleen (right) at necropsy from NSG mice transplanted with MV4;11 cells and treated with vehicle. Bars represent the median ( $n = 5$ ). **G**, Body weight variance over time in NSG mice transplanted with *MLL-r* PDX (2263) cells and treated with vehicle or TDI-11055 (200mg/kg, p.o., q.d.; or 200 mg/kg, p.o., b.i.d., with 5 days on and 2 days off). Error bars represent mean  $\pm$  SEM ( $n = 7$ ). **H**, % of human CD45<sup>+</sup> cells in the bone marrow (left) and the spleen (right) at necropsy from NSG mice transplanted with PDX (2263) cells and treated with vehicle. Bars represent the median ( $n = 5$ ).



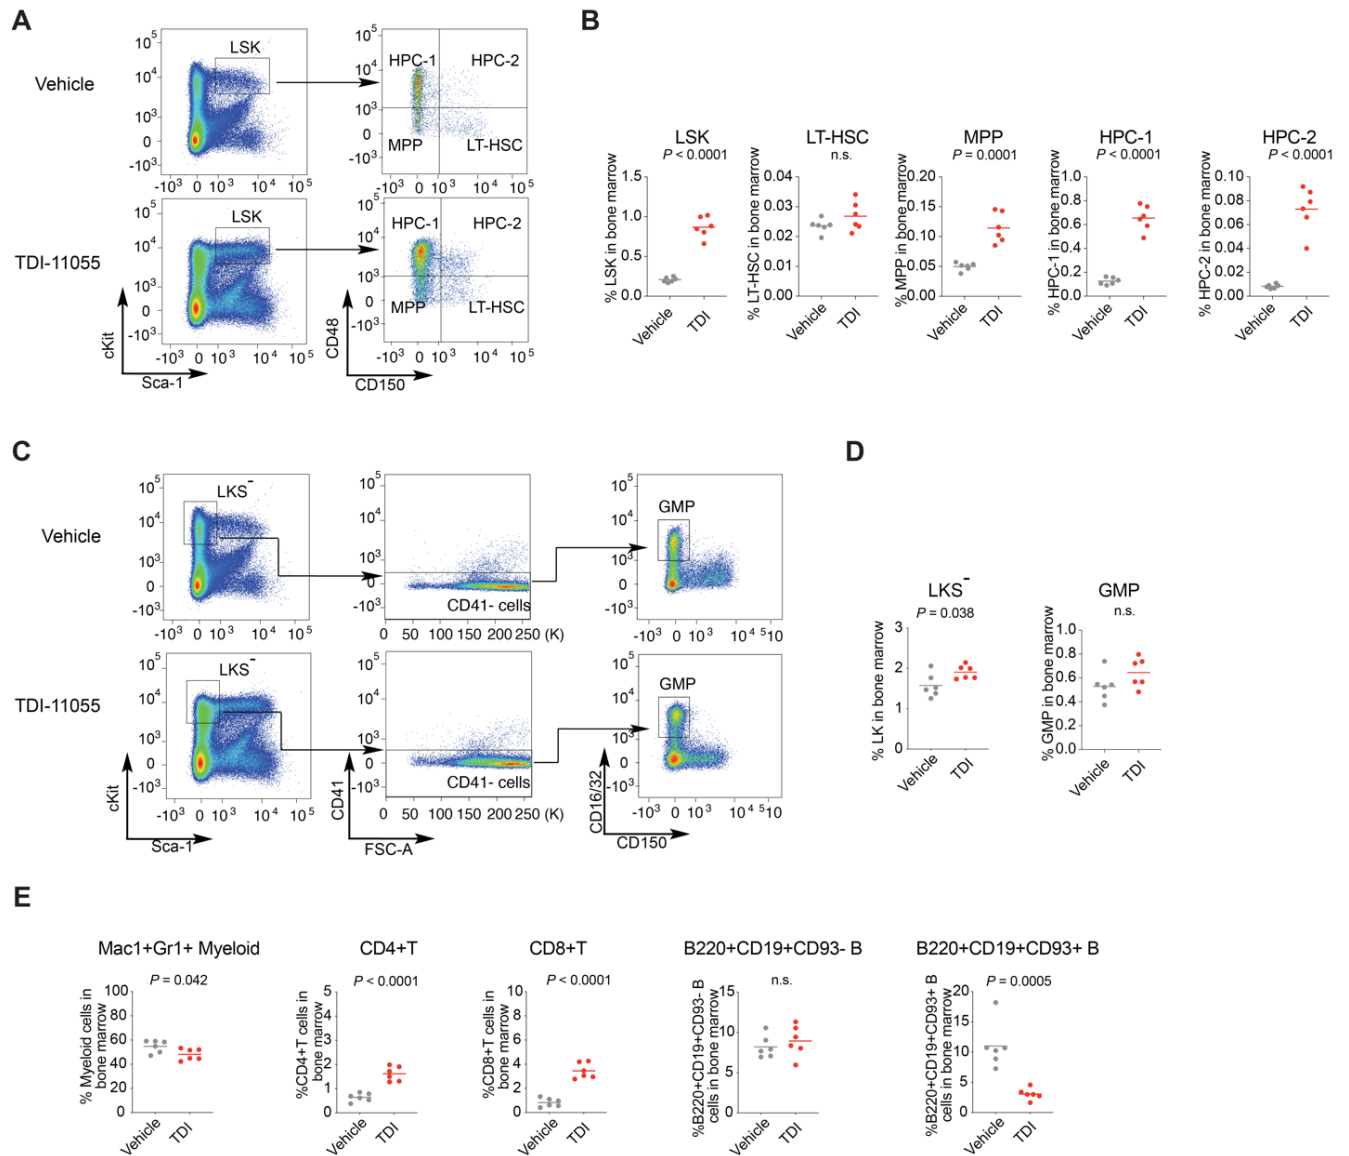

**Supplementary Figure S9. The impact of TDI-11055 on normal hematopoiesis after 28 days of treatment.** **A, B**, Representative flow cytometric gating plots (**A**) and the percentage (**B**) of LSK (Lin<sup>-</sup>Sca-1<sup>+</sup>c-Kit<sup>+</sup>), LT-HSC (Lin<sup>-</sup>Sca-1<sup>+</sup>c-Kit<sup>+</sup>CD150<sup>+</sup>CD48<sup>-</sup>), MPP (Lin<sup>-</sup>Sca-1<sup>+</sup>c-Kit<sup>+</sup>CD150<sup>-</sup>CD48<sup>-</sup>), HPC-1 (Lin<sup>-</sup>Sca-1<sup>+</sup>c-Kit<sup>+</sup>CD150<sup>-</sup>CD48<sup>+</sup>), and HPC-2 (Lin<sup>-</sup>Sca-1<sup>+</sup>c-Kit<sup>+</sup>CD150<sup>+</sup>CD48<sup>+</sup>) populations in bone marrow samples harvested from mice at the end of 28-day treatment with vehicle or TDI-11055 (200 mg/kg, p.o., q.d.). Bars represent the median ( $n = 6$ ).  $P$  values by unpaired two-tailed Student's  $t$ -test. **C, D**, Representative flow cytometric gating plots (**C**) and the percentage (**D**) of LKS<sup>-</sup> (Lin<sup>-</sup>c-Kit<sup>+</sup> Sca-1<sup>-</sup>), GMP (Lin<sup>-</sup>Sca-1<sup>-</sup>c-Kit<sup>+</sup>CD41<sup>-</sup>CD150<sup>-</sup>CD16/32<sup>+</sup>) populations in bone marrow samples harvested from mice at the end of 28-day treatment with vehicle or TDI-11055. Bars represent the median ( $n = 6$ ).  $P$  values by unpaired two-tailed Student's  $t$ -test. **E**, Percentage of myeloid cell (Mac1<sup>+</sup>Gr1<sup>+</sup>), CD8<sup>+</sup> T (TCRb<sup>+</sup>CD8<sup>+</sup>), CD4<sup>+</sup> T (TCRb<sup>+</sup>CD4<sup>+</sup>), mature recirculating B (B220<sup>+</sup>CD19<sup>+</sup>CD93<sup>-</sup>), and

developing B (B220<sup>+</sup>CD19<sup>+</sup>CD93<sup>+</sup>) cell populations in bone marrow samples harvested from mice at the end of 28-day treatment with vehicle or TDI-11055. Bars represent the median ( $n = 6$ ).  $P$  values by unpaired two-tailed Student's  $t$ -test.

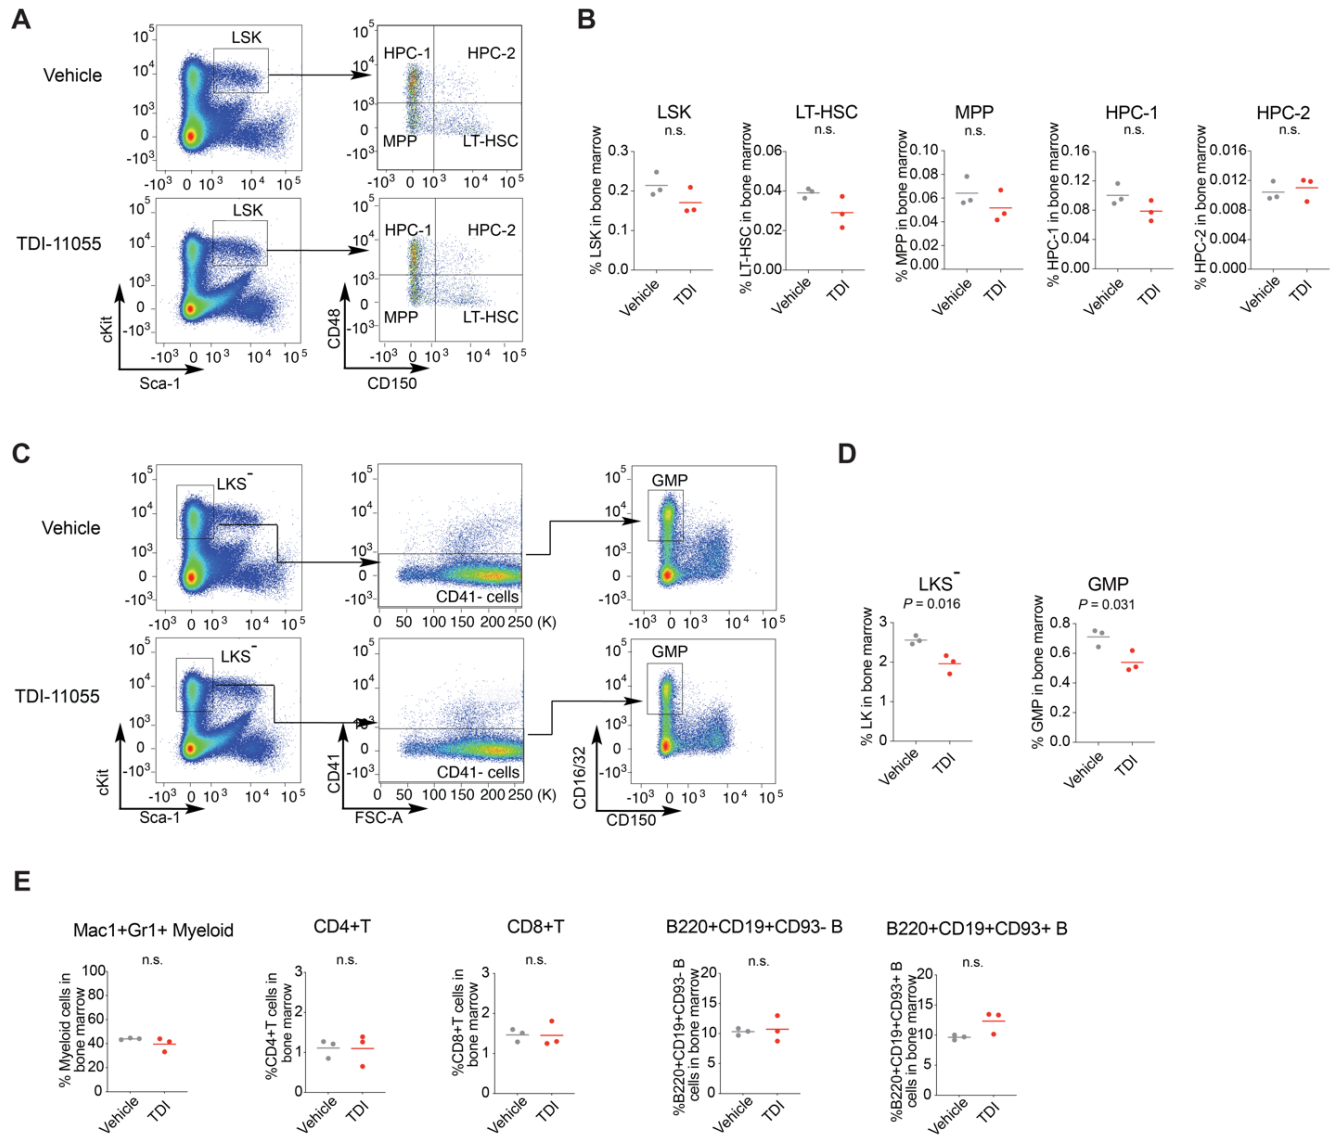

**Supplementary Figure S10. TDI-11055-induced changes in normal hematopoiesis are reversible after cessation of treatment.** **A, B**, Representative flow cytometric gating plots (**A**) and the percentage (**B**) of LSK (Lin<sup>-</sup>Sca-1<sup>+</sup>c-Kit<sup>+</sup>), LT-HSC (Lin<sup>-</sup>Sca-1<sup>+</sup>c-Kit<sup>+</sup>CD150<sup>+</sup>CD48<sup>-</sup>), MPP (Lin<sup>-</sup>Sca-1<sup>+</sup>c-Kit<sup>+</sup>CD150<sup>-</sup>CD48<sup>-</sup>), HPC-1 (Lin<sup>-</sup>Sca-1<sup>+</sup>c-Kit<sup>+</sup>CD150<sup>+</sup>CD48<sup>+</sup>), and HPC-2 (Lin<sup>-</sup>Sca-1<sup>+</sup>c-Kit<sup>+</sup>CD150<sup>+</sup>CD48<sup>+</sup>) populations in bone marrow samples harvested from mice 80 days after completing treatment with vehicle or TDI-11055 (200 mg/kg, p.o., q.d.). Bars represent the median ( $n = 3$ ).  $P$  values by unpaired two-tailed Student's  $t$ -test. **C, D**, Representative flow cytometric gating plots (**C**) and the percentage (**D**) of LKS<sup>-</sup> (Lin<sup>-</sup>c-Kit<sup>+</sup> Sca-1<sup>-</sup>), GMP (Lin<sup>-</sup>Sca-1<sup>-</sup>c-Kit<sup>+</sup>CD41<sup>-</sup>CD150<sup>-</sup>CD16/32<sup>+</sup>) populations in bone marrow samples harvested from mice 80 days after completing treatment with vehicle or TDI-11055. Bars represent the median ( $n = 3$ ).  $P$  values by unpaired two-tailed Student's  $t$ -test. **E**, Percentage of myeloid cell (Mac1<sup>+</sup>Gr1<sup>+</sup>), CD8<sup>+</sup> T (TCRb<sup>+</sup>CD8<sup>+</sup>), CD4<sup>+</sup> T (TCRb<sup>+</sup>CD4<sup>+</sup>), mature recirculating

B (B220<sup>+</sup>CD19<sup>+</sup>CD93<sup>-</sup>), and developing B (B220<sup>+</sup>CD19<sup>+</sup>CD93<sup>+</sup>) cell populations in bone marrow samples harvested from mice 80 days after completing treatment with vehicle or TDI-11055. Bars represent the median ( $n = 3$ ).  $P$  values by unpaired two-tailed Student's  $t$ -test.
