# Supplementary material for: Small-Molecule Inhibition of the Acyl-Lysine Reader ENL as a Strategy against Acute Myeloid Leukemia
Source: PubMed Central journal article supplement — Cancer Discov. 2022 Sep 2;12(11):2684–709. doi: 10.1158/2159-8290.CD-21-1307 (PMC9627135; doi:10.1158/2159-8290.cd-21-1307), 2022-09-02
Supplement: cd-21-1307_supp2.pdf [file cd-21-1307_supp2.pdf]

## Supplementary Methods for

### Small-molecule inhibition of the acyl-lysine reader ENL as a strategy against acute myeloid leukemia

Yiman Liu<sup>1,2</sup>, Qinglan Li<sup>1,2</sup>, Fatemeh Alikarami<sup>3</sup>, Declan R. Barrett<sup>3</sup>, Leila Mahdavi<sup>3</sup>, Hangpeng Li<sup>1,2,4</sup>, Sylvia Tang<sup>1,2</sup>, Tanweer A. Khan<sup>5</sup>, Mayako Michino<sup>5</sup>, Connor Hill<sup>6,7</sup>, Lele Song<sup>1,2</sup>, Lu Yang<sup>8</sup>, Yuanyuan Li<sup>9</sup>, Sheela Pangen Pokharel<sup>8</sup>, Andrew W. Stamford<sup>5</sup>, Nigel Liverton<sup>5</sup>, Louis M. Renzetti<sup>10</sup>, Simon Taylor<sup>11</sup>, Gillian F. Watt<sup>11</sup>, Tammy Ladduwahetty<sup>11</sup>, Stacia Kargman<sup>5,10</sup>, Peter T. Meinke<sup>5,12</sup>, Michael A. Foley<sup>5</sup>, Junwei Shi<sup>1,2,13</sup>, Haitao Li<sup>9</sup>, Martin Carroll<sup>14</sup>, Chun-Wei Chen<sup>8</sup>, Alessandro Gardini<sup>6</sup>, Ivan Maillard<sup>14</sup>, David J. Huggins<sup>5,15</sup>, Kathrin M. Bernt<sup>3,16,#</sup>, Liling Wan<sup>1,2,13,17,#</sup>

<sup>1</sup>Department of Cancer Biology, University of Pennsylvania, Philadelphia, PA, 19104, USA.

<sup>2</sup>Abramson Family Cancer Research Institute, Perelman School of Medicine, University of Pennsylvania, Philadelphia, PA, 19104, USA.

<sup>3</sup>Division of Pediatric Oncology, Children's Hospital of Philadelphia, Philadelphia, PA, USA.

<sup>4</sup>Department of the School of Engineering and Applied Science, University of Pennsylvania, Philadelphia, PA, 19104, USA.

<sup>5</sup>Tri-Institutional Therapeutics Discovery Institute, 413 East 69th Street, New York, NY, 10021, USA.

<sup>6</sup>Wistar Institute, Gene Expression and Regulation Program, 3601 Spruce Street, Philadelphia, PA 19104, USA.

<sup>7</sup>Cell and Molecular Biology Graduate Group, Perelman School of Medicine, University of Pennsylvania, PA 19104, USA.

<sup>8</sup>Department of Systems Biology, Beckman Research Institute, City of Hope, Duarte, CA, 91016 USA.

<sup>9</sup>MOE Key Laboratory of Protein Sciences, Beijing Frontier Research Center for Biological Structure, School of Medicine, Tsinghua University, and Tsinghua-Peking Center for Life Sciences, Beijing 100084, China.

<sup>10</sup>Bridge Medicines, 420 East 70<sup>th</sup> Street, NY, NY, 10021, USA.

<sup>11</sup>Pharmaron Drug Discovery, Pharmaron UK, West Hill Innovation Park, Hertford Road, Hoddesdon, Hertfordshire, EN11 9FH. United Kingdom.

<sup>12</sup>Department of Pharmacology, Weill Cornell Medical College, New York, NY 10021, USA.

<sup>13</sup>Epigenetics Institute, Perelman School of Medicine, University of Pennsylvania, Philadelphia, PA, 19104, USA.

<sup>14</sup>Division of Hematology/Oncology, Department of Medicine, Perelman School of Medicine, University of Pennsylvania, Philadelphia, PA 19104, USA.

<sup>15</sup>Department of Physiology and Biophysics, Weill Cornell Medical College, New York, NY, 10021, USA.

<sup>16</sup>Department of Pediatrics, Perelman School of Medicine, University of Pennsylvania, Philadelphia, PA, 19104, USA.

<sup>17</sup>Institute for Regenerative Medicine, Perelman School of Medicine, University of Pennsylvania, Philadelphia, PA, 19104, USA.

#Corresponding Authors:

Liling Wan, University of Pennsylvania, BRB II/III, RM751, 421 Curie Blvd, Philadelphia, PA 19104. Phone: 215-898-3116; E-mail: [Liling.Wan@Pennmedicine.upenn.edu](mailto:Liling.Wan@Pennmedicine.upenn.edu);

Kathrin M. Bernt, The Children's Hospital of Philadelphia, Colket Translational Research Center room 3064, 3501 Civic Center Boulevard, Philadelphia, PA 19104. Phone: 215-370-3171; E-mail: [berntk@chop.edu](mailto:berntk@chop.edu)

## Compound synthesis

SGC-iMLLT is synthesized following reported method (1). TDI-11055 is synthesized following the following steps.

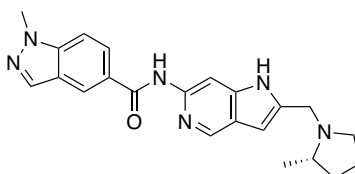

**TDI-11055**

### Step 1

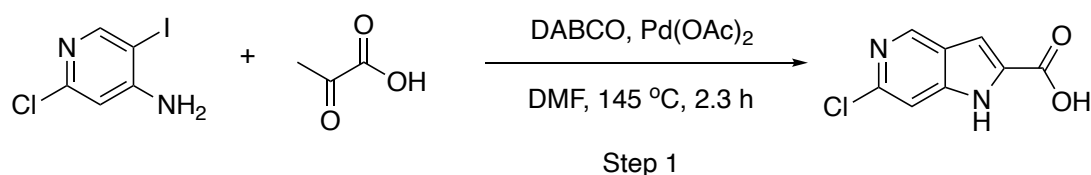

### 6-chloro-1H-pyrrolo[3,2-c]pyridine-2-carboxylic acid, 1

To a solution of 2-chloro-5-iodopyridin-4-amine (12.9 g, 50.70 mmol, 1 *eq*), Pd(OAc)<sub>2</sub> (682.91 mg, 3.04 mmol, 0.06 *eq*) and DABCO (17.06 g, 152.09 mmol, 16.73 mL, 3 *eq*) in dry DMF (300 mL) was added 2-oxopropanoic acid (13.39 g, 152.09 mmol, 10.71 mL, 3 *eq*) under N<sub>2</sub>. The reaction mixture was degassed with N<sub>2</sub> for 20 minutes, then heated to 145 °C for 2 hours. The reaction mixture was concentrated under reduced pressure and the residue taken up in H<sub>2</sub>O (2.4 L). The mixture was adjusted pH to 9-10 by 1N aq. NaOH and filtered through Celite. After washing of the filtrate with EtOAc (500 mL) and MTBE (500 mL), the pH was adjusted to 3 with 1N HCl to give 6-chloro-1H-pyrrolo[3,2-c]pyridine-2-carboxylic acid (3.5 g, 17.80 mmol, 35.11% yield) as a yellow solid.

<sup>1</sup>H NMR: 1 (400 MHz, DMSO-d<sub>6</sub>) δ 13.77-13.08 (m, 1H), 12.31 (br s, 1H), 8.78 (s, 1H), 7.39 (s, 1H), 7.26 (s, 1H)

## Step 2

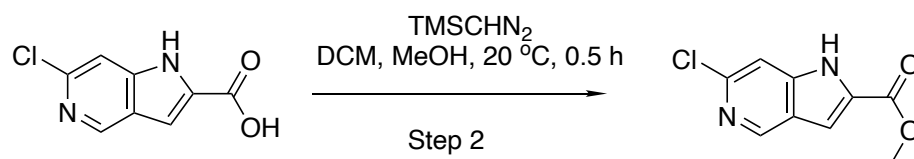

### Methyl 6-chloro-1H-pyrrolo[3,2-c]pyridine-2-carboxylate, 2

To a solution of 6-chloro-1H-pyrrolo[3,2-c]pyridine-2-carboxylic acid (3.5 g, 17.80 mmol, 1 *eq*) in MeOH (52.5 mL) and DCM (52.5 mL) was added TMSCHN<sub>2</sub> (2 M, 35 mL, 3.93 *eq*) dropwise until a persistent yellow color formed, the mixture was stirred at 20 °C for 0.5 hour. The mixture was added 3.5 mL AcOH, then the mixture was concentrated under reduced pressure. The residue was purified by column chromatography (SiO<sub>2</sub>, Petroleum ether/Ethyl acetate=1:0 to 3:1) to give methyl 6-chloro-1H-pyrrolo[3,2-c]pyridine-2-carboxylate (2.4 g, 11.40 mmol, 64.00% yield) as a yellow solid. <sup>1</sup>H NMR: 2 (400 MHz, METHANOL-d<sub>4</sub>) δ 8.57 (s, 1H), 7.30 (s, 1H), 7.17 (s, 1H), 3.79 (s, 3H)

## Step 3

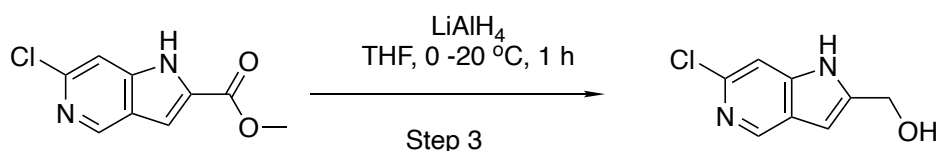

### (6-chloro-1H-pyrrolo[3,2-c]pyridin-2-yl)methanol, 3

To a solution of LiAlH<sub>4</sub> (864.99 mg, 22.79 mmol, 2 *eq*) in dry THF (25 mL) was stirred at 0 °C under N<sub>2</sub>. Then methyl 6-chloro-1H-pyrrolo[3,2-c]pyridine-2-carboxylate (2.4 g, 11.40 mmol, 1 *eq*) was dissolved in THF (25 mL) and dropwise to solution of LiAlH<sub>4</sub> at 0 °C under N<sub>2</sub>. And then the mixture was slowly warmed to 20 °C and stirred at 20 °C for 1 hour under N<sub>2</sub>. The reaction mixture was cooled to 0 °C, then 10 % aq. NaOH (20 mL) and H<sub>2</sub>O (30 mL) were added. The mixture was stirred at 0 °C for 0.5 hour. Then the mixture was filtered and washed with EtOAc (20 mL) and separated organic layers were dried over Na<sub>2</sub>SO<sub>4</sub>, and concentrated under reduced pressure. To give (6-chloro-1H-pyrrolo[3,2-c]pyridin-2-yl) methanol (1.5 g, crude) as a yellow solid. This crude material (3) was used as such for the next reaction without further purification and characterization.

#### Step 4

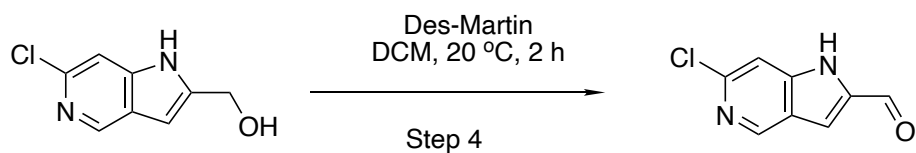

#### 6-chloro-1H-pyrrolo[3,2-c]pyridine-2-carbaldehyde, 4

To a solution of (6-chloro-1H-pyrrolo[3,2-c]pyridin-2-yl) methanol (1.5 g, 8.21 mmol, 1 *eq*) in DCM (40 mL) was added Dess-Martin (10.45 g, 24.64 mmol, 7.63 mL, 3 *eq*), the mixture was stirred at 20 °C for 12 hours. The reaction mixture was diluted with Sat. NaHCO<sub>3</sub> (50 mL), extracted with DCM (30 mL\*3). The combined organic layers were washed with brine (30mL\*2), dried over Na<sub>2</sub>SO<sub>4</sub>, filtered and concentrated under reduced pressure. To give 6-chloro-1H-pyrrolo[3,2-c]pyridine-2-carbaldehyde (1.5 g, crude) as a yellow solid. <sup>1</sup>H NMR: 4 (400 MHz, DMSO-d<sub>6</sub>) δ 9.91 (s, 1H), 8.88 (s, 1H), 7.57 (s, 1H), 7.42 (s, 1H)

#### Step 5

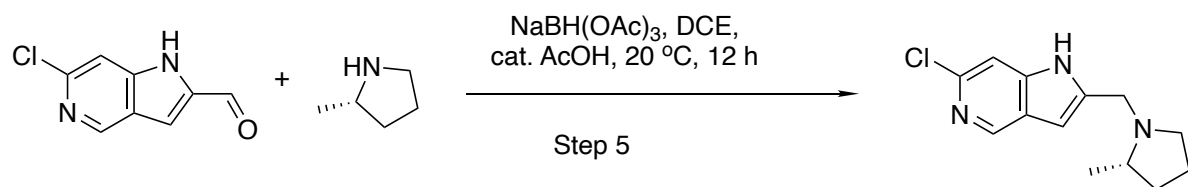

#### 6-chloro-2-[[[(2S)-2-methylpyrrolidin-1-yl]methyl]-1H-pyrrolo[3,2-c]pyridine, 5

To a solution of 6-chloro-1H-pyrrolo[3,2-c]pyridine-2-carbaldehyde (1.5 g, 8.31 mmol, 1 *eq*) in DCE (35 mL) was added (2S)-2-methylpyrrolidine (707.24 mg, 8.31 mmol, 1 *eq*) and AcOH (498.78 mg, 8.31 mmol, 475.03 uL, 1 *eq*), the mixture was stirred at 20 °C for 0.5 hour, then NaBH(OAc)<sub>3</sub> (3.52 g, 16.61 mmol, 2 *eq*) was added, the result mixture was stirred at 20 °C for 11.5 hours under N<sub>2</sub>. The reaction mixture was diluted with sat. NaHCO<sub>3</sub> (15 mL) and extracted with DCM (10 mL\*3). The combined organic layers were washed with brine (10 mL\*3), dried over Na<sub>2</sub>SO<sub>4</sub>, filtered and concentrated under reduced pressure to give a residue. The residue was purified by column chromatography (SiO<sub>2</sub>, EtOAc/MeOH = 1/0 to 9/1) to give 6-chloro-2-[[[(2S)-2-methylpyrrolidin-1-yl]methyl]-1H-pyrrolo[3,2-c] pyridine (0.8 g, 3.20 mmol, 38.57% yield) as a red oil. <sup>1</sup>H NMR: 5 (400 MHz, METHANOL-d<sub>4</sub>) δ 8.50 (s, 1H), 7.38 (s, 1H), 6.54 (s, 1H), 4.12 (d, *J* = 13.9 Hz, 1H), 3.50 (d, *J* = 13.9 Hz, 1H), 3.04-2.94 (m, 1H), 2.57-2.45 (m, 1H),

2.31 (q,  $J = 9.0$  Hz, 1H), 2.03 (dddd,  $J = 5.8, 7.2, 9.2, 12.6$  Hz, 1H), 1.80-1.68 (m, 2H), 1.48 (dddd,  $J = 6.3, 8.8, 10.2, 12.5$  Hz, 1H), 1.20 (d,  $J = 6.1$  Hz, 3H).

### Step 6

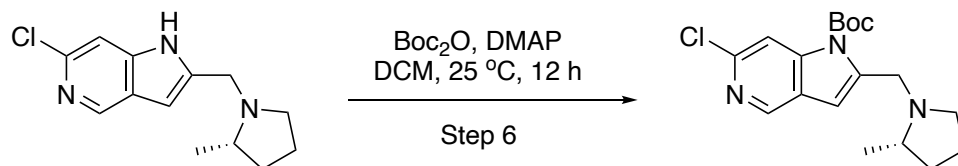

### Tert-butyl 6-chloro-2-[[[(2S)-2-methylpyrrolidin-1-yl]methyl]pyrrolo[3,2-c]pyridine-1-carboxylate, 6

To a solution of 6-chloro-2-[[[(2S)-2-methylpyrrolidin-1-yl]methyl]-1H-pyrrolo[3,2-c]pyridine (0.8 g, 3.20 mmol, 1 *eq*) in DCM (25 mL) was added a solution of tert-butoxycarbonyl tert-butyl carbonate (769.03 mg, 3.52 mmol, 809.51  $\mu$ L, 1.1 *eq*) in DCM (25 mL), and then DMAP (39.14 mg, 320.33  $\mu$ mol, 0.1 *eq*) was added, the result mixture was stirred at 25 °C for 12 hours. The reaction mixture was concentrated under reduced pressure to give a residue. The residue was purified by column chromatography (SiO<sub>2</sub>, Petroleum ether/Ethyl acetate = 1/0 to 0/1) to give tert-butyl 6-chloro-2-[[[(2S)-2-methylpyrrolidin-1-yl]methyl]pyrrolo[3,2-c]pyridine-1-carboxylate, 6 (1 g, 2.86 mmol, 89.23% yield) as a red solid.

### Step 7

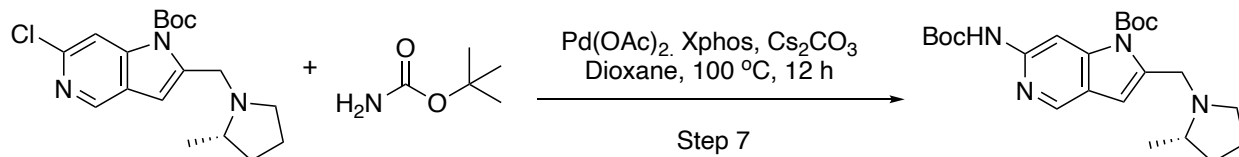

### Tert-butyl 6-(tert-butoxycarbonylamino)-2-[[[(2S)-2-methylpyrrolidin-1-yl]methyl]pyrrolo[3,2-c]pyridine-1-carboxylate, 7

To a solution of tert-butyl 6-chloro-2-[[[(2S)-2-methylpyrrolidin-1-yl]methyl]pyrrolo[3,2-c]pyridine-1-carboxylate (1 g, 2.86 mmol, 1 *eq*) and tert-butyl carbamate (502.26 mg, 4.29 mmol, 1.5 *eq*) in dioxane (20 mL) was added XPhos (272.53 mg, 571.67  $\mu$ mol, 0.2 *eq*), Pd(OAc)<sub>2</sub> (64.17 mg, 285.83  $\mu$ mol, 0.1 *eq*) and Cs<sub>2</sub>CO<sub>3</sub> (1.86 g, 5.72 mmol, 2 *eq*), the mixture was stirred at 100 °C for 12 hours under N<sub>2</sub>. The reaction mixture was concentrated under reduced pressure

to give a residue. The residue was purified by column chromatography (SiO<sub>2</sub>, DCM/MeOH = 1/0 to 10/1) to give tert-butyl 6-(tert-butoxycarbonylamino)-2-[[[(2S)-2-methylpyrrolidin-1-yl]methyl]pyrrolo [3,2-c]pyridine-1-carboxylate (0.4 g, 929.07 μmol, 32.50% yield as a yellow oil. <sup>1</sup>H NMR:7 (400 MHz, METHANOL-d<sub>4</sub>) δ 8.45-8.38 (m, 1H), 7.79 (s, 1H), 6.43 (s, 1H), 4.10 (d, *J* = 13.8 Hz, 1H), 3.53-3.43 (m, 1H), 3.06-2.97 (m, 1H), 2.57-2.46 (m, 1H), 2.34 (q, *J* = 9.1 Hz, 1H), 2.11-1.97 (m, 1H), 1.82-1.68 (m, 7H), 1.61-1.42 (m, 11H), 1.25-1.18 (m, 4H).

### Step 8

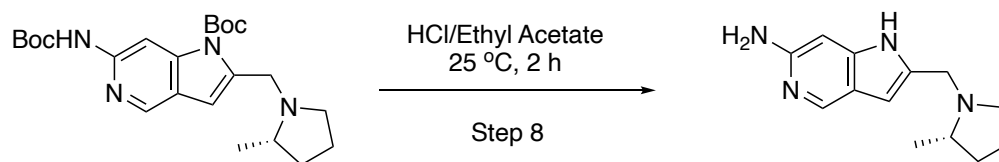

### 2-[[[(2S)-2-methylpyrrolidin-1-yl]methyl]-1H-pyrrolo[3,2-c]pyridin-6-amine, 8

A mixture of tert-butyl 6-(tert-butoxycarbonylamino)-2-[[[(2S)-2-methylpyrrolidin-1-yl]methyl]pyrrolo[3,2-c]pyridine-1-carboxylate (0.4 g, 929.07 μmol, 1 *eq*) in HCl/EtOAc (15 mL) was stirred at 25 °C for 2 hours. The reaction mixture was concentrated under reduced pressure to give 2-[[[(2S)-2-methylpyrrolidin-1-yl]methyl]-1H-pyrrolo[3,2-c]pyridine-6-amine, 8 (0.3 g, crude, HCl) as gray solid.

### Step 9

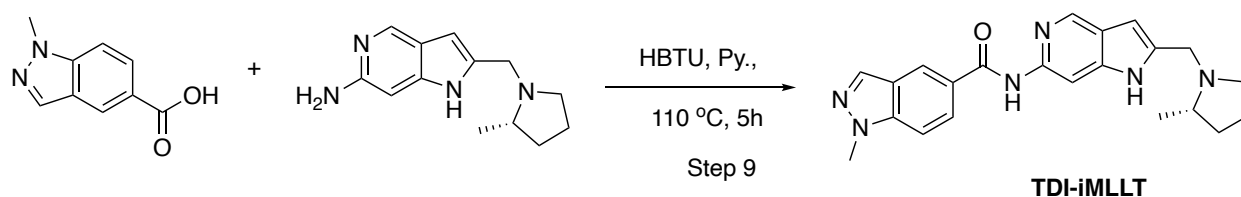

### 1-methyl-N-[2-[[[(2S)-2-methylpyrrolidin-1-yl]methyl]-1H-pyrrolo[3,2-c]pyridin-6-yl]indazole-5-carboxamide, TDI-11055

To a solution of 1-methylindazole-5-carboxylic acid (76.49 mg, 434.20 μmol, 1 *eq*) in Py. (4 mL) was added HBTU (164.67 mg, 434.20 μmol, 1 *eq*), the mixture was stirred at 110 °C for 0.5 hour under N<sub>2</sub>. And then 2-[[[(2S)-2-methylpyrrolidin-1-yl]methyl]-1H-pyrrolo[3,2-c]pyridin-6-amine (0.1 g, 434.20 μmol, 1 *eq*, HCl) was added, the result mixture was stirred at 110 °C for 4.5 hours under N<sub>2</sub>. The reaction mixture was concentrated under pressure. The residue was diluted

with Sat. NaHCO<sub>3</sub> (20 mL) and extracted with EtOAc (15 mL\*3). The combined organic layers were washed with brine (15 mL\*2), dried over Na<sub>2</sub>SO<sub>4</sub>, filtered and concentrated under reduced pressure. The residue was purified by prep-HPLC (neutral condition) to give 1-methyl-N-[2-[[[(2S)-2-methylpyrrolidin-1-yl]methyl]-1H-pyrrolo[3,2-c] pyridin-6-yl]indazole-5-carboxamide (35 mg, 90.10 μmol, 20.75% yield, 100% purity) as a yellow solid.

**LCMS:** TDI-11055 (M+H<sup>+</sup>): 389.1@ 1.515 min (10-80 % ACN in H<sub>2</sub>O, 4.5 min)

**<sup>1</sup>H NMR:** TDI-11055 (400 MHz, METHANOL-d<sub>4</sub>) δ 8.57-8.45 (m, 2H), 8.18 (d, *J* = 4.2 Hz, 2H), 8.05 (dd, *J* = 1.5, 8.8 Hz, 1H), 7.68 (d, *J* = 9.0 Hz, 1H), 6.49 (s, 1H), 4.18-4.04 (m, 4H), 3.50 (d, *J* = 13.9 Hz, 1H), 3.07-2.96 (m, 1H), 2.56-2.45 (m, 1H), 2.34 (q, *J* = 9.2 Hz, 1H), 2.09-1.95 (m, 1H), 1.81-1.65 (m, 2H), 1.54-1.41 (m, 1H), 1.21 (d, *J* = 6.2 Hz, 3H)

**SFC:** TDI-11055 (Retention time: 2.62; 100% ee)

## References

1. Moustakim M, Christott T, Monteiro OP, Bennett J, Giroud C, Ward J, et al. Discovery of an MLLT1/3 YEATS Domain Chemical Probe. *Angewandte Chemie Int Ed.* 2018;57:16302–7.
